# Supplementary material for: A selenide-based coumarin fluorescent probe for fluorescence imaging of hypochlorous acid in cells and zebrafish
Source: Royal Society of Chemistry journal article supplement (doi:10.1039/d4nj00826j), 2024-01-01
Supplement: d4nj00826j1.pdf [file d4nj00826j1.pdf]

## Supporting Information

### **A Selenide-Based Coumarin Fluorescent Probe for Fluorescence Imaging of Hypochlorous Acid in Cells and Zebrafish**

Yan He, Taorui Yang, Bin Lin, Jiaxin Fan, Yifeng Han\*

*Department of Chemistry, Zhejiang Sci-Tech University, Hangzhou, 310018, China.*

*E-mail: [zstuchem@gmail.com](mailto:zstuchem@gmail.com); Tel: +86-751-86843550;*

## Contents

|                                               |     |
|-----------------------------------------------|-----|
| Experimental section.....                     | S3  |
| Additional spectroscopic data.....            | S6  |
| The characterization data of <b>Cse</b> ..... | S20 |
| References.....                               | S22 |

## Experimental section

Reagents, materials, and apparatus:

All the solvents used in the experiment were of analytic grade. The reaction progress was monitored by thin-layer chromatography (TLC) on silica gel plates (GF<sub>254</sub>) visualized by UV light. 200-300 mesh silica gel was used for column chromatography. NMR experiments were carried out on a Bruker AV-400 NMR spectrometer with chemical shifts reported in ppm (in CDCl<sub>3</sub>, or TMS as an internal standard). Mass spectra were measured on an Agilent 1290 LC-MS spectrometer. All pH measurements were made with a Sartorius basic pH-Meter PB-10. Fluorescence spectra were determined on a PerkinElmer LS55 Fluorescence spectrophotometer. Absorption spectra were collected on a Shimadzu UV 2501(PC)S UV-Visible spectrophotometer. The excitation and emission widths for Cse were all 3.

Preparation of various ROS and RNS species:<sup>1</sup>

HClO: Take an appropriate amount of commercially available hypochlorous acid solution and prepare about 10<sup>-2</sup> M hypochlorous acid stock solution with deionized water. Dilute the hypochlorous acid solution, and calibrate its concentration ( $\epsilon = 350 \text{ M}^{-1}\text{cm}^{-1}$ ) through the ultraviolet spectrum absorption value at 292 nm.

ONOO<sup>-</sup>: To a vigorously stirred solution of NaNO<sub>2</sub> (0.6 M, 10 mL) and H<sub>2</sub>O<sub>2</sub> (0.7 M, 10 mL) in deionized H<sub>2</sub>O at 0 °C was added HCl (0.6 M, 10 mL), immediately followed by the rapid addition of NaOH (1.5 M, 20 mL). Excess hydrogen peroxide was removed by passing the solution through a short column of MnO<sub>2</sub>. The concentration of ONOO<sup>-</sup> was determined by UV analysis with the extinction coefficient at 302 nm ( $\epsilon = 1670 \text{ M}^{-1} \text{ cm}^{-1}$ ). The solution was stored at -20 °C for use.

NO: A solution of the  $\text{H}_2\text{SO}_4$  (3.6 M) was added dropwise into a stirred solution of  $\text{NaNO}_2$  (7.3 M). The emitted gas was allowed to pass through a solution of  $\text{NaOH}$  (2 M) first and then deionized  $\text{H}_2\text{O}$  to make a saturated NO solution of 2.0 mM.

$^1\text{O}_2$ :  $\text{NaMoO}_4$  (10 mM) and  $\text{H}_2\text{O}_2$  (10 mM) was prepared in PBS (10 mM, pH 7.4). Equal aliquots of these solutions were then mixed to yield  $^1\text{O}_2$  of 5 mM.

$\text{H}_2\text{O}_2$ : Take an appropriate amount of commercially available  $\text{H}_2\text{O}_2$  solution and prepare about  $10^{-2}$  M  $\text{H}_2\text{O}_2$  stock solution with deionized water. And its concentration is calibrated by the ultraviolet absorption value at 240 nm ( $\epsilon = 43.6\text{M}^{-1}\text{cm}^{-1}$ ).

$\cdot\text{OH}$ :  $\cdot\text{OH}$  was generated by Fenton reaction. To a solution of  $\text{H}_2\text{O}_2$  (1.0 mM, 1.0 mL) in PBS (10 mM, pH 7.4) was added  $\text{FeSO}_4$  solution (1.0 mM, 100  $\mu\text{L}$ ) at ambient temperature (stock solution 0.1 mM).

$\text{ROO}\cdot$ :  $\text{ROO}\cdot$  was generated from 2, 2'-azobis(2-amidinopropane)dihydrochloride, which was dissolved in PBS (10 mM, pH 7.4) 1 h before use to make a stock solution of 10 mM.

Synthesis:

Synthesis of 7-(diethylamino)-4-(trifluoromethyl)coumarin (**2**): 3-(diethylamino)phenol (1 g, 6.05 mmol) was dissolved in 5 mL of anhydrous ethanol under nitrogen protection. Then anhydrous zinc chloride (1.24 g, 9.08 mmol) and trifluoroacetic acid ethyl ester (1.23 g, 6.66 mmol) were added sequentially, and the mixture was refluxed for 8 hours. After confirming the completion of the reaction by TLC, the reaction mixture was cooled to room temperature, and ethanol was removed under reduced pressure to obtain the crude product. The crude product was purified by silica gel column chromatography (using petroleum ether: ethyl acetate = 20:1 as the

eluent) to yield the yellow solid **2** (1.25 g, 72%). <sup>1</sup>H NMR (400 MHz, CDCl<sub>3</sub>) δ 7.49 (dq, *J* = 9.3, 2.1 Hz, 1H), 6.63 (dd, *J* = 9.2, 2.6 Hz, 1H), 6.53 (d, *J* = 2.6 Hz, 1H), 6.36 (s, 1H), 3.43 (q, *J* = 7.1 Hz, 4H), 1.22 (t, *J* = 7.1 Hz, 6H).

#### Cell Viability Assay:

The MTT method was employed to assess cell viability. Cells were cultured in a 96-well plate for 12 hours until they adhered to the plate. Subsequently, cells were treated with different concentrations of **Cse** (0-10 μM) and incubated for 24 hours. Then, 10 μL of 3-(4, 5-dimethyl-2-thiazolyl)-2, 5-diphenyltetrazolium bromide (MTT, 5 mg/mL) was added, and the cells were further incubated for 4 hours. After removing the residual MTT, 100 μL of DMSO was added. The absorbance of each well was measured at 492 nm using an enzyme-linked immunosorbent assay (ELISA) reader, and cell viability was calculated using the following formula:  $(a-b) / (c-b) \times 100\%$ , where a, b, and c represent the absorbance of the treated well, control well, and untreated well, respectively.

### Additional spectroscopic data

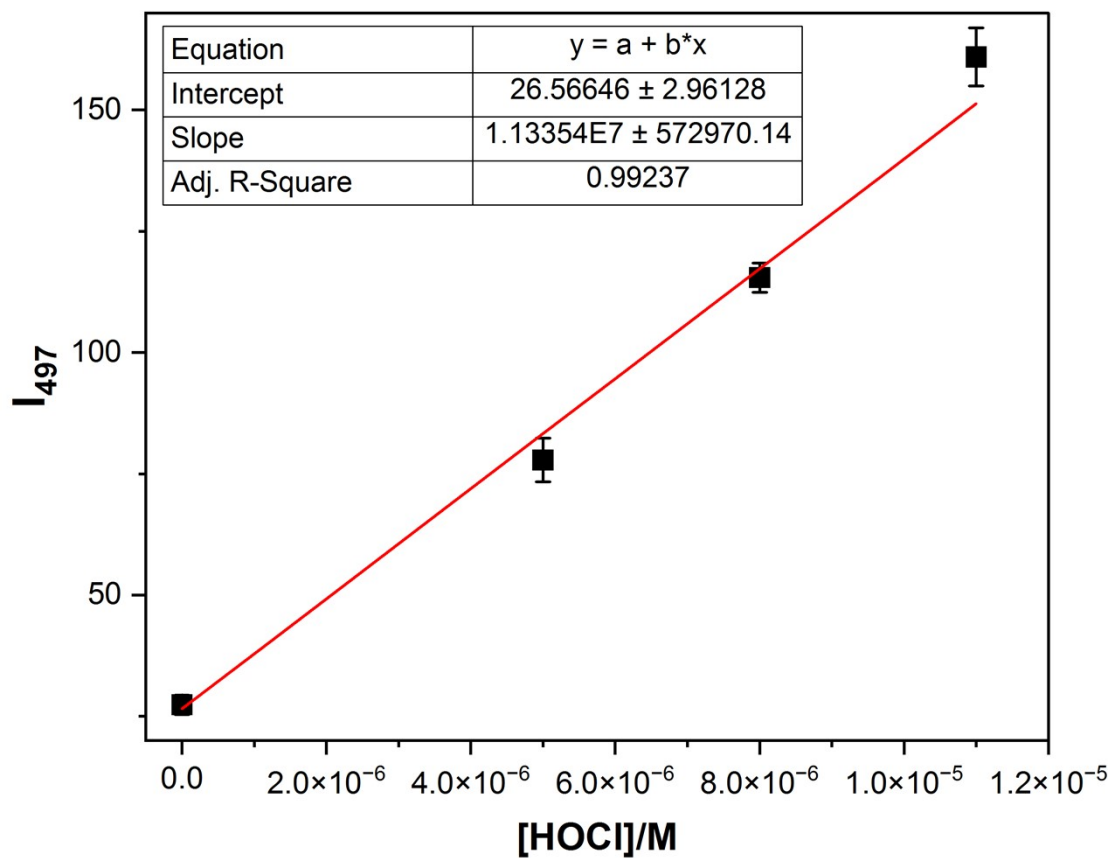

**Fig. S1.** The fluorescent intensity of **Cse** at 497 nm ( $I_{497}$ ) as a function of HOCl concentration (0-1.2 equiv.) in PBS buffer solution (10 mM, pH 7.4, containing 50% EtOH,  $\lambda_{ex} = 395$  nm).

The detection limit (DL) of HOCl using **Cse** was determined from the following equation: <sup>2</sup>

$$DL = 3*\sigma/K$$

Where  $\sigma$  is the standard deviation of the blank solution; K is the slope of the calibration curve.

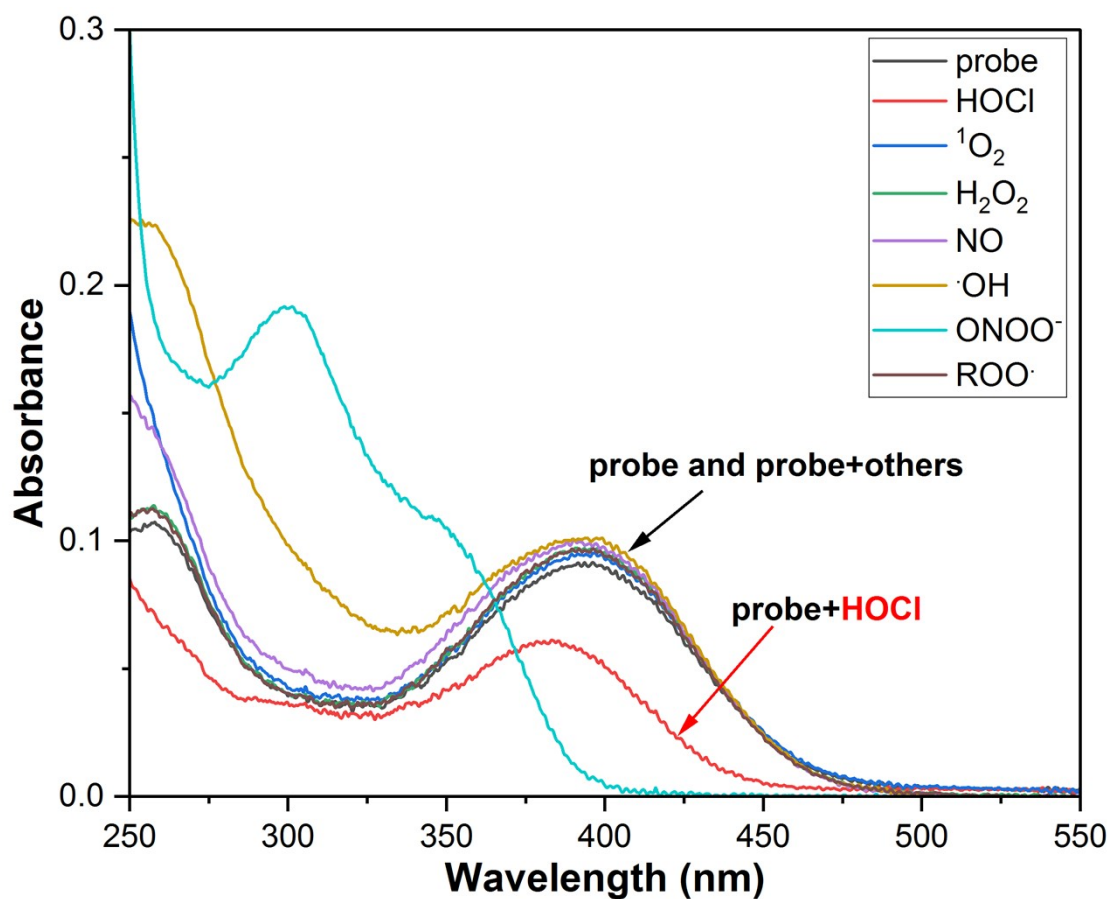

**Fig. S2.** The UV-Vis absorption spectra of Cse (10.0  $\mu\text{M}$ ) before and after the addition of various analytes (30  $\mu\text{M}$  each, including  $\cdot\text{OH}$ ,  $\text{H}_2\text{O}_2$ ,  $\text{NO}$ ,  $^1\text{O}_2$ ,  $\text{ONOO}^-$ , and  $\text{ROO}\cdot$ ), and  $\text{HOCl}$  (30  $\mu\text{M}$ ), in PBS buffer solution (10 mM, pH 7.4, containing 50% EtOH).

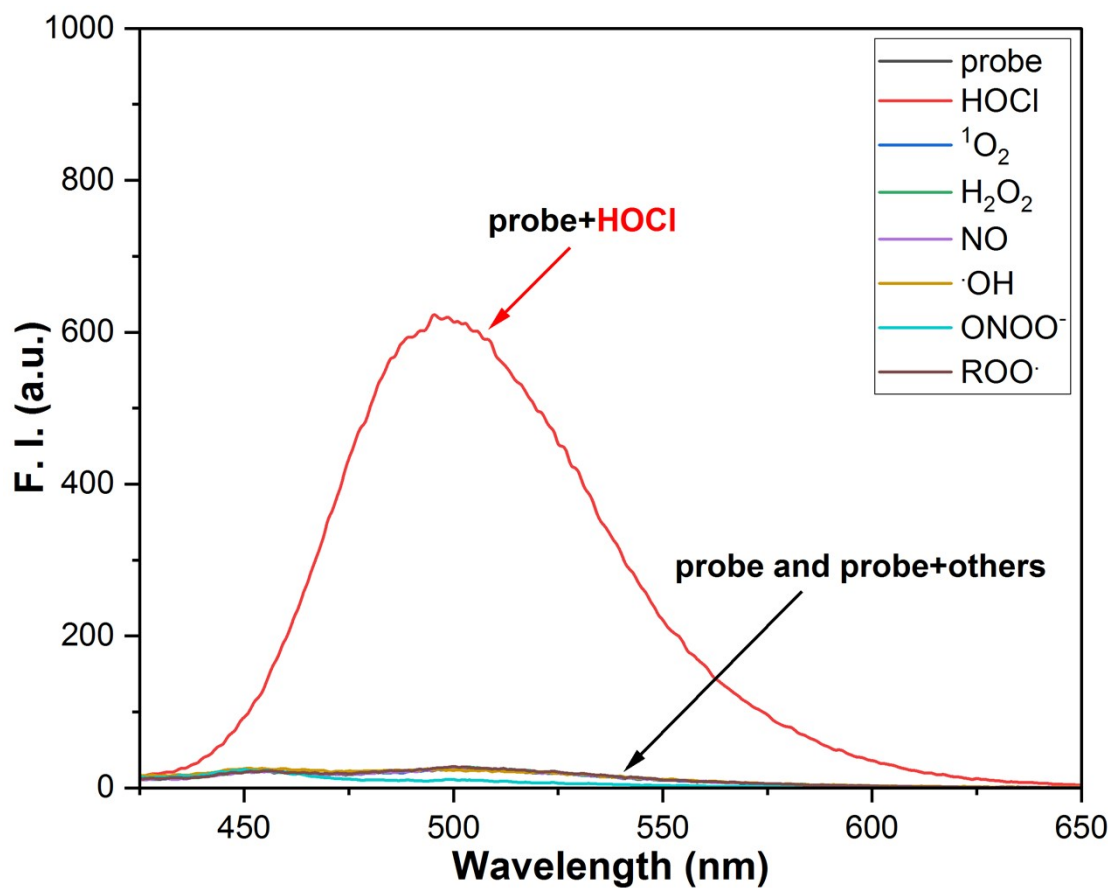

**Fig. S3.** The fluorescent spectra of Cse (10  $\mu\text{M}$ ) before and after the addition of various analytes (30  $\mu\text{M}$  each, including  $\cdot\text{OH}$ ,  $\text{H}_2\text{O}_2$ ,  $\text{NO}$ ,  $^1\text{O}_2$ ,  $\text{ONOO}^-$ , and  $\text{ROO}\cdot$ ), and  $\text{HOCl}$  (30  $\mu\text{M}$ ), in PBS buffer solution (10 mM, pH 7.4, containing 50% EtOH,  $\lambda_{\text{ex}} = 395 \text{ nm}$ ).



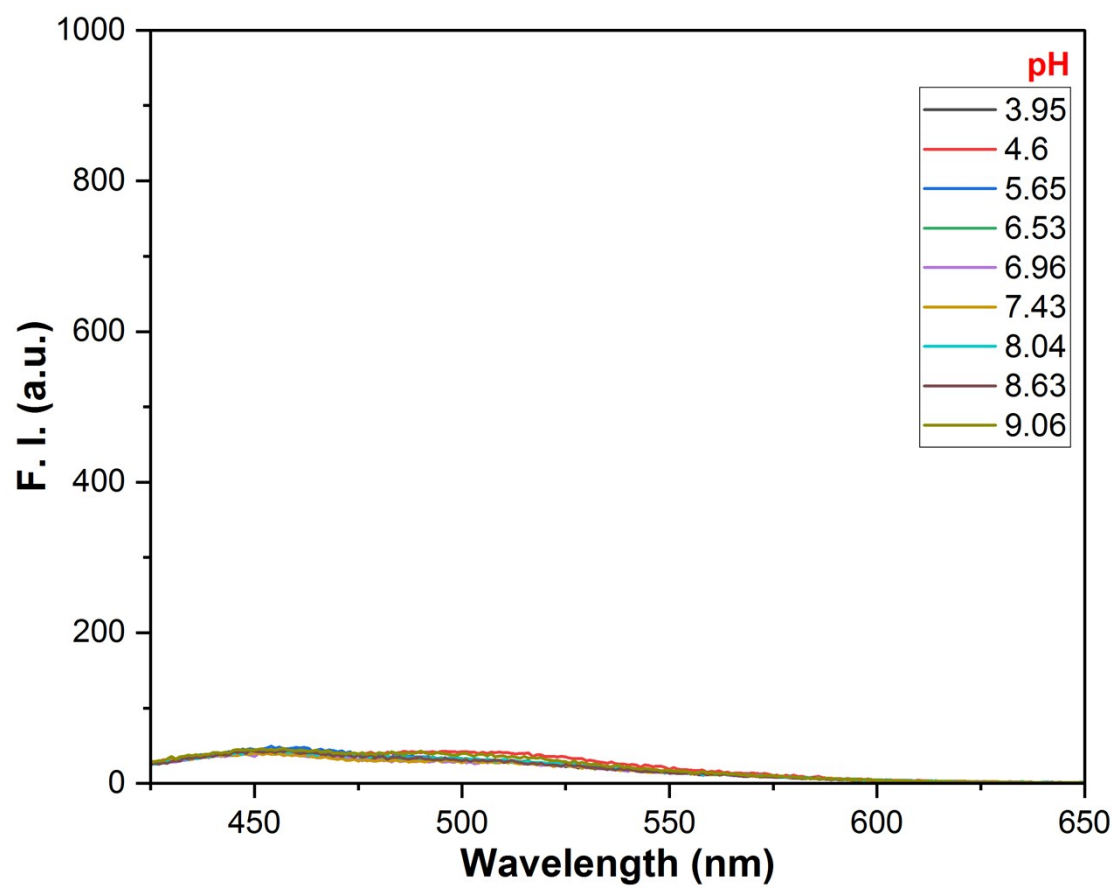

Fig. S4. The fluorescence spectra of the probe Cse (10.0 μM) alone at different pH values.

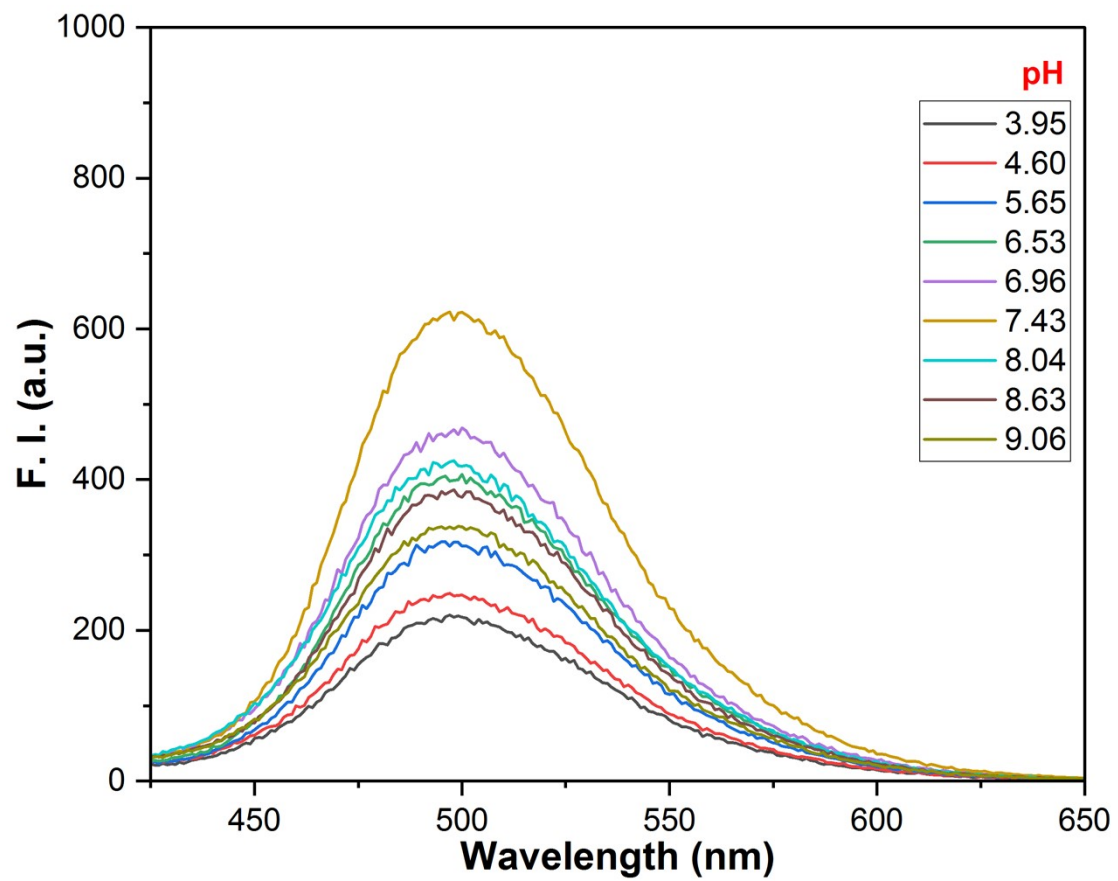

**Fig. S5.** The fluorescence spectra of the probe Cse (10.0  $\mu\text{M}$ ) in the present of HOCl (30.0  $\mu\text{M}$ ) at different pH values ( $\lambda_{\text{ex}} = 395 \text{ nm}$ ).

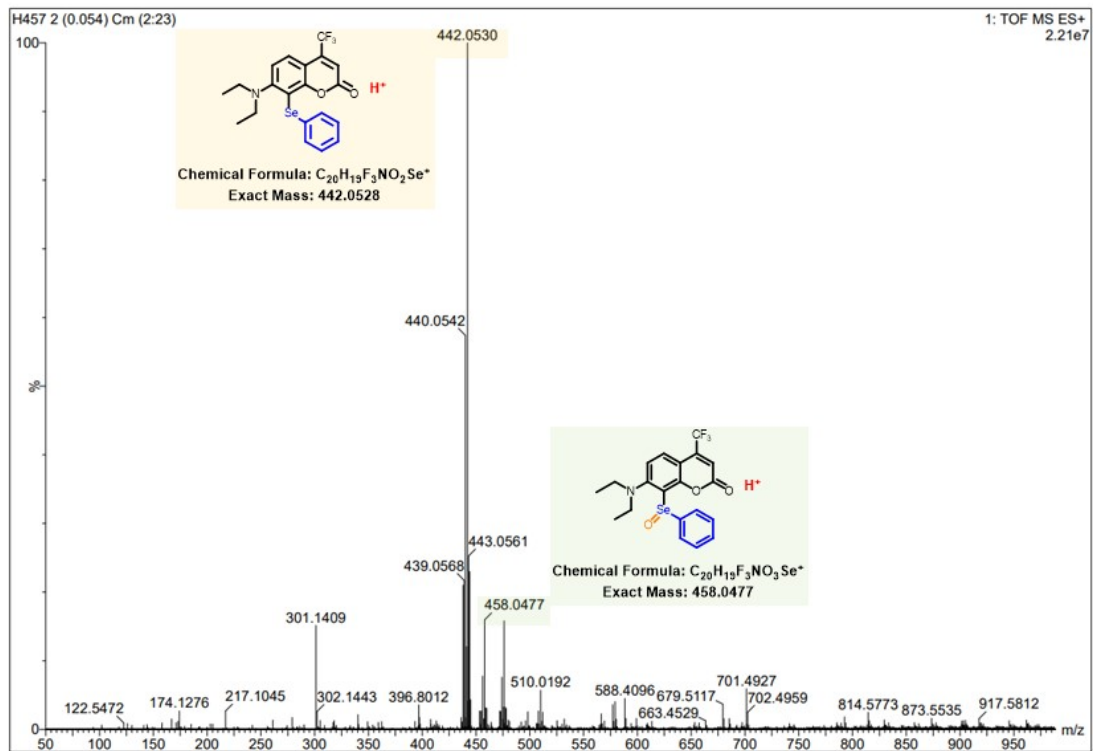

**Fig. S6.** The HR-MS spectrum of Cse and HOCl mixture.

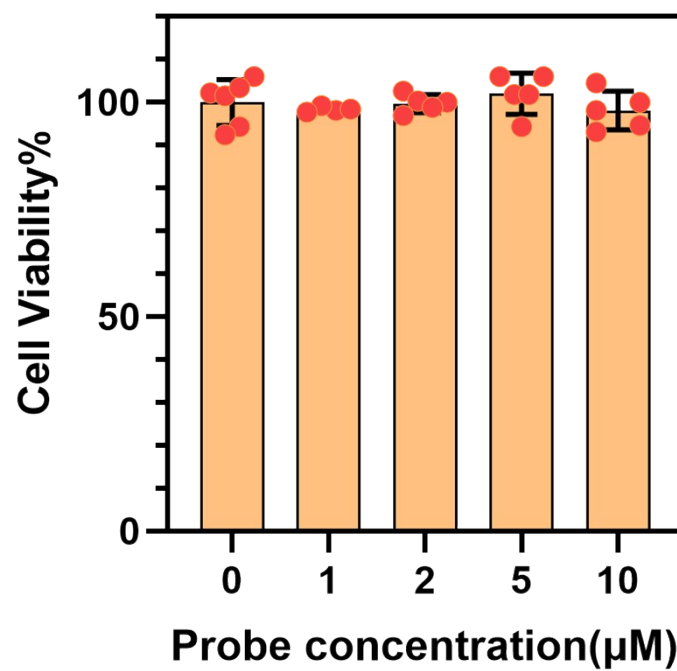

**Fig. S7.** Cell viability of the probe in a standard MTT assay in living HeLa cells for 24 h. The experiment was repeated three times.

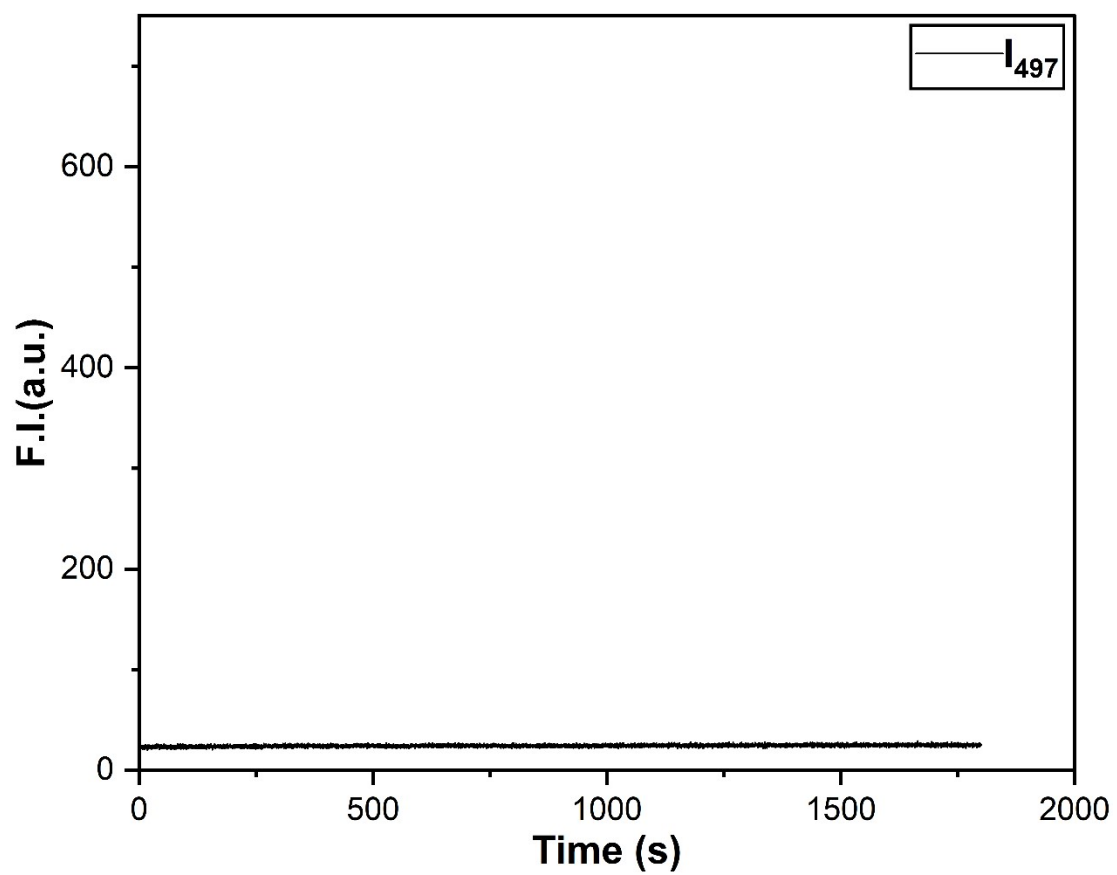

**Fig. S8.** Fluorescence intensity of Cse at 497 nm ( $I_{497}$ ) as a function of reaction time (0-1800 sec) under continuous illumination with excitation light ( $\lambda_{ex} = 395$  nm).

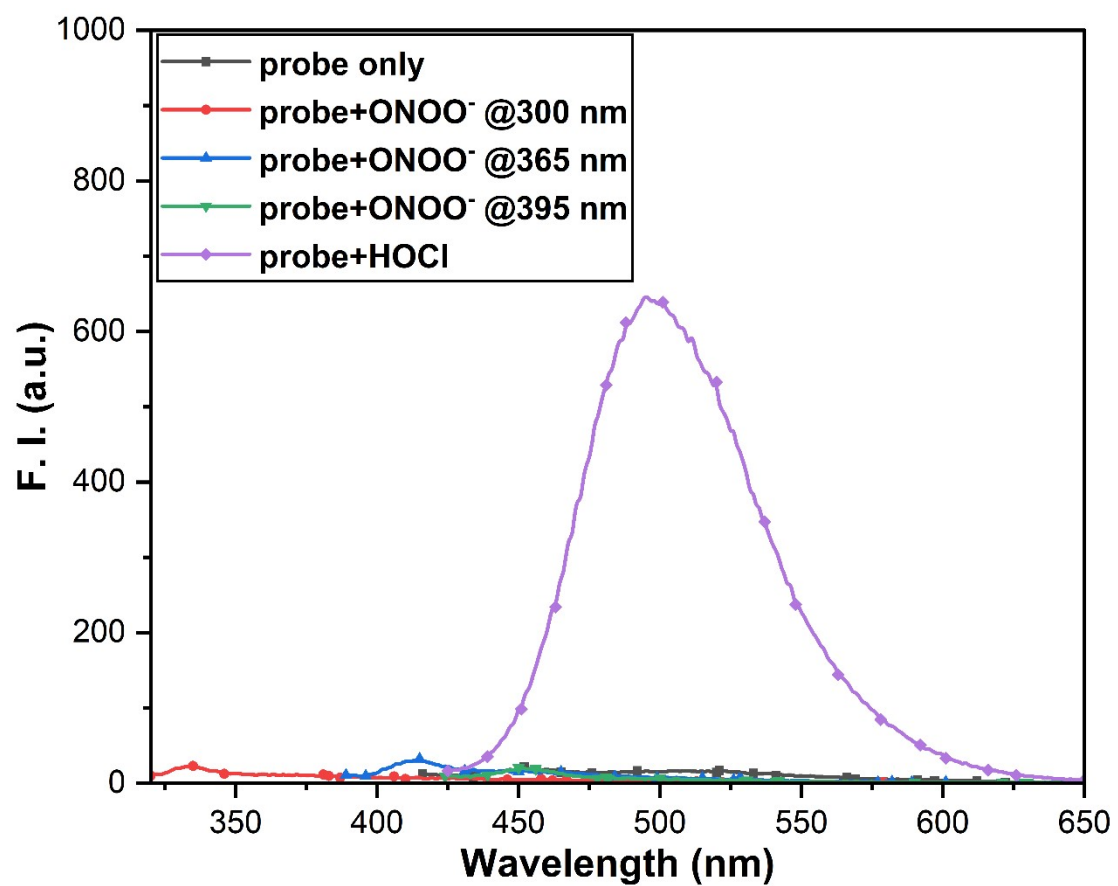

**Fig. S9.** Fluorescence spectra of *Cse* in the presence of  $\text{ONOO}^-$  with different excitation light ( $\lambda_{\text{ex}}$  = 300, 365, and 395 nm, respectively).

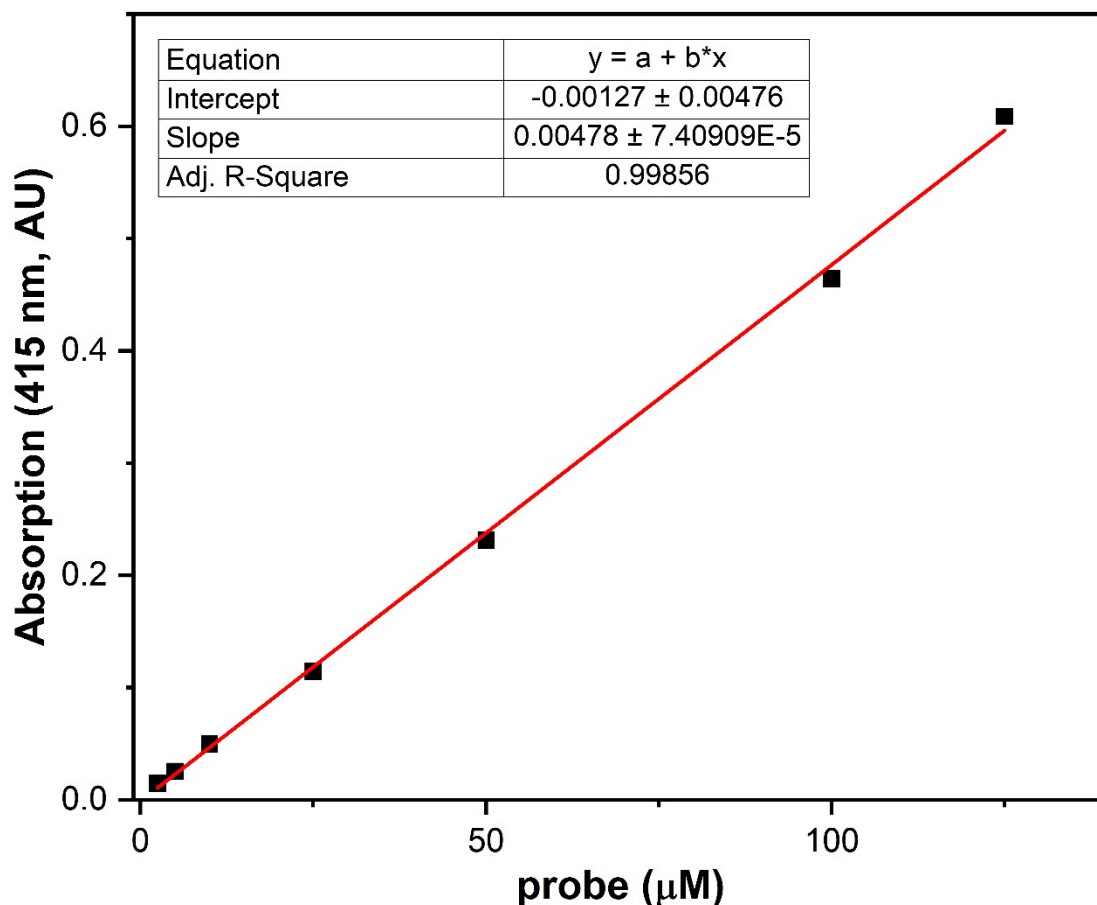

**Fig. S10** The standard curve for probe water solubility determination. The probe was dissolved in DMSO to make a 100 mM stock solution. An aliquot of this solution was diluted with water to 500  $\mu\text{M}$ , sonicated for 5 min, and then immediately subjected to UV absorption measurement. This 500  $\mu\text{M}$  probe solution was diluted with water to 250  $\mu\text{M}$ , sonicated, and collected for the absorption spectra. The procedures were repeated until the absorption spectra of the probe in the 2.5 to 500  $\mu\text{M}$  concentration range were measured. The intensity at maximum absorption wavelength was plotted against concentration to yield a standard curve. Next, the aliquot of the probe stock solution in DMSO was diluted with  $\text{H}_2\text{O}$  to (500  $\mu\text{M}$ ). After being sonicated for 5 min, the solution was centrifuged at 10000 rpm for 5 min to remove residues. The supernatant was tested for the absorption spectra. The water solubility of the probe was calculated by taking the absorption intensity of this solution at  $\lambda_{\text{max}}$  into the standard curve.

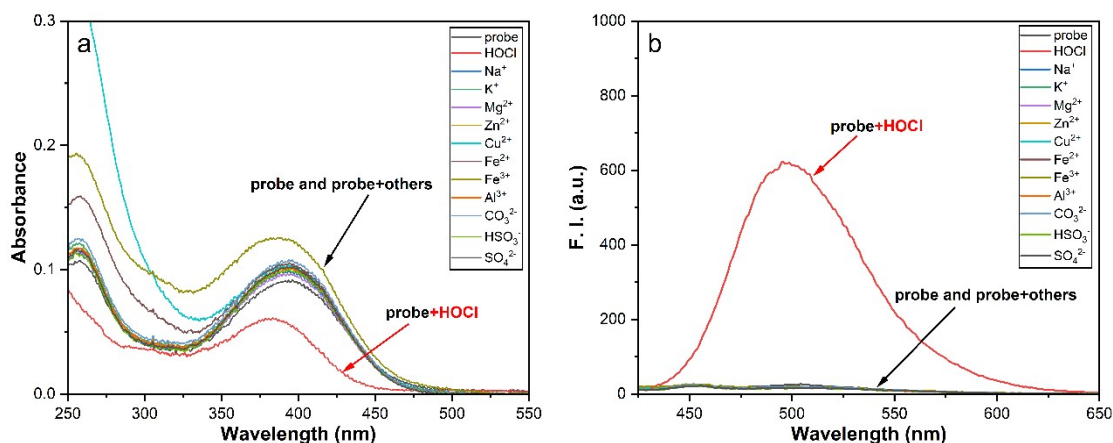

**Fig. S11** a) The UV-Vis absorption spectra of **Cse** (10  $\mu\text{M}$ ) before and after the addition of various analytes (30  $\mu\text{M}$  each, including  $\text{Na}^+$ ,  $\text{K}^+$ ,  $\text{Mg}^{2+}$ ,  $\text{Zn}^{2+}$ ,  $\text{Cu}^{2+}$ ,  $\text{Fe}^{2+}$ ,  $\text{Fe}^{3+}$ ,  $\text{Al}^{3+}$ ,  $\text{CO}_3^{2-}$ ,  $\text{HSO}_3^-$ , and  $\text{SO}_4^{2-}$ ), and  $\text{HOCl}$  (30  $\mu\text{M}$ ), in PBS buffer solution (10 mM, pH 7.4, containing 50% EtOH). b) The fluorescent spectra of **Cse** (10  $\mu\text{M}$ ) before and after the addition of various analytes (30  $\mu\text{M}$  each, including  $\text{Na}^+$ ,  $\text{K}^+$ ,  $\text{Mg}^{2+}$ ,  $\text{Zn}^{2+}$ ,  $\text{Cu}^{2+}$ ,  $\text{Fe}^{2+}$ ,  $\text{Fe}^{3+}$ ,  $\text{Al}^{3+}$ ,  $\text{CO}_3^{2-}$ ,  $\text{HSO}_3^-$ , and  $\text{SO}_4^{2-}$ ), and  $\text{HOCl}$  (30  $\mu\text{M}$ ), in PBS buffer solution (10 mM, pH 7.4, containing 50% EtOH,  $\lambda_{\text{ex}} = 395 \text{ nm}$ ).



**Table S1.** Performance comparison of Cse with other reported selenide-based HOCl fluorescent probes.

| Entry | Structures                                                                          | LOD     | Response Time/min | Stokes Shift/nm | Cell | Zebrafish (Mouse) | Refs      |
|-------|-------------------------------------------------------------------------------------|---------|-------------------|-----------------|------|-------------------|-----------|
| 1     | 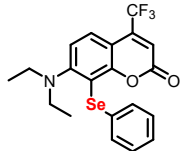   | 10.5 nM | 6                 | 112             | √    | √                 | This work |
| 2     |    | -       | 3                 | 97              | ×    | ×                 | S3        |
| 3     |    | 1.3 nM  | 0.1               | 130             | √    | ×                 | S4        |
| 4     |   | 0.63 μM | 10                | 32              | √    | ×                 | S5        |
| 5     |  | 7.98 nM | 5                 | 16              | √    | ×                 | S6        |
| 6     |  | 18.5 nM | 0.1               | 88              | √    | ×                 | S7        |
| 7     |  | 1.1 nM  | 0.1               | 41              | √    | ×                 | S8        |

|    |                                                                                     |         |     |     |   |   |     |
|----|-------------------------------------------------------------------------------------|---------|-----|-----|---|---|-----|
| 8  | 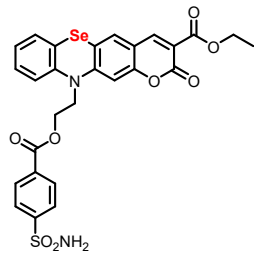   | 27 nM   | 0.1 | 89  | √ | × | S9  |
| 9  |    | 0.85 μM | 25  | 96  | √ | × | S10 |
| 10 |    | 1.8 nM  | 10  | 110 | √ | × | S11 |
| 11 |   | 0.8 nM  | 0.1 | 50  | √ | × | S12 |
| 12 |  | 13.3 nM | 0.1 | 132 | √ | √ | S13 |
| 13 |  | 4.6 nM  | 0.1 | 123 | √ | × | S14 |
| 14 |  | 30.9 nM | 0.1 | 15  | √ | × | S15 |
| 15 |  | 19.6 nM | 2   | 14  | √ | × | S16 |

|    |                                                                                     |         |      |     |   |   |     |
|----|-------------------------------------------------------------------------------------|---------|------|-----|---|---|-----|
| 16 | 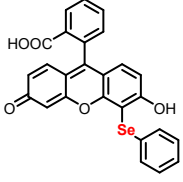   | 44.7 nM | 0.01 | 27  | √ | × | S17 |
| 17 |    | 44.5 nM | 4    | 66  | √ | × | S18 |
| 18 |    | -       | 5    | 50  | √ | × | S19 |
| 19 |   | 58.6 nM | 15   | 73  | √ | √ | S20 |
| 20 |  | 10 nM   | 0.1  | 75  | √ | × | S21 |
| 21 |  | 0.35 μM | 3    | 105 | √ | √ | S22 |

## The characterization data of Cse

### <sup>1</sup>H NMR of 2

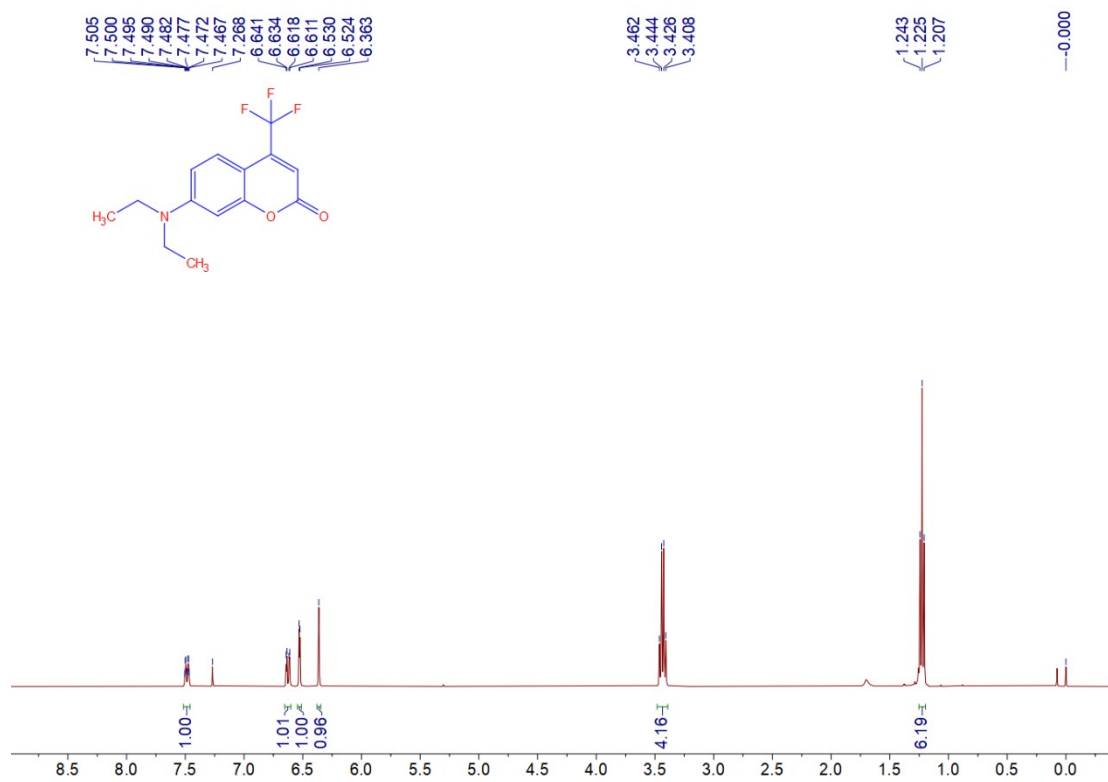

### <sup>1</sup>H NMR of 3 (Cse)

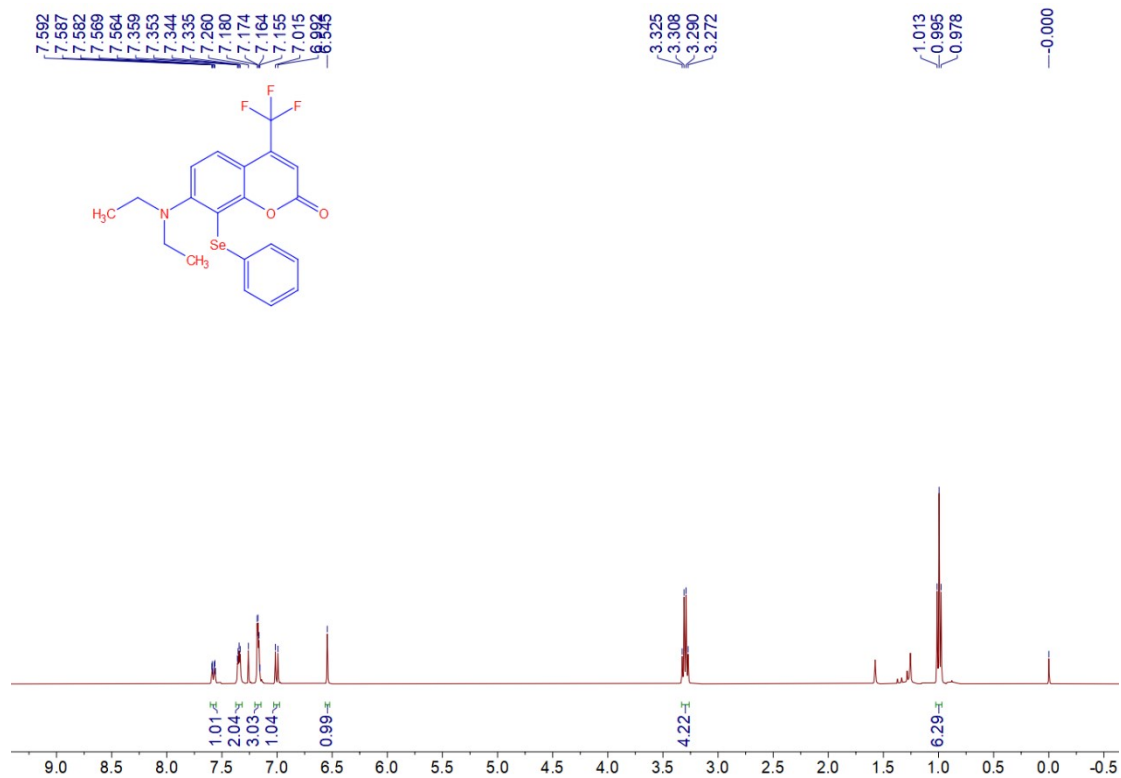

**<sup>13</sup>C NMR of 3 (Cse)**

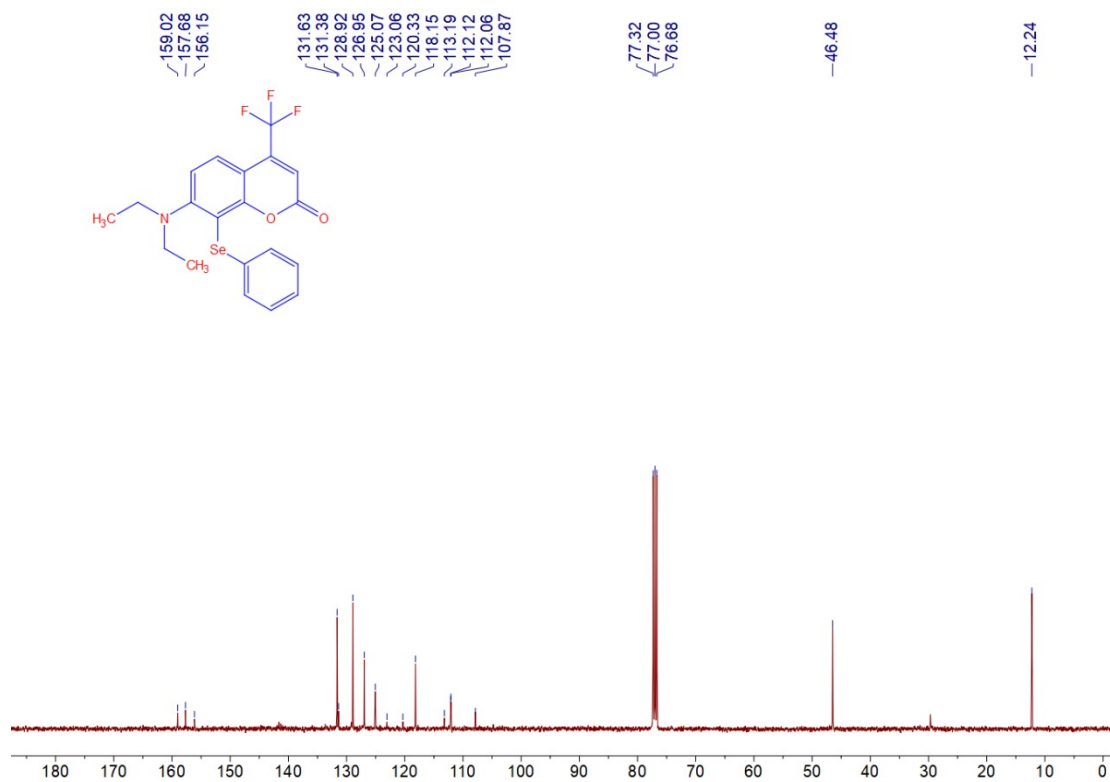

**HR-MS of 3 (Cse)**

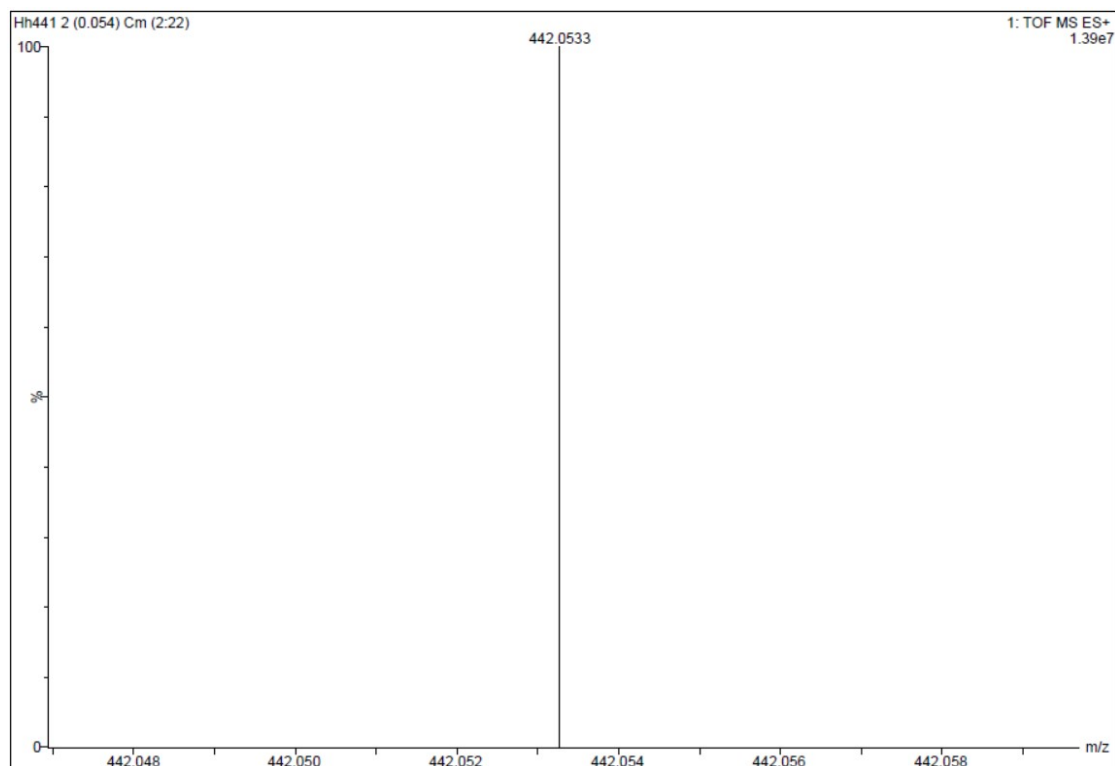

## References

- S1 T. Peng, N. K. Wong, X. Chen, Y. K. Chan, D. H. Ho, Z. Sun, J. J. Hu, J. Shen, H. El-Nezami, D. Yang, *J. Am. Chem. Soc.*, 2014, **136**, 11728-11733.
- S2 (a) J. T. Yeh, P. Venkatesan and S. P. Wu, *New J. Chem.*, 2014, **38**, 6198-6204. (b) A. Roy, D. Kand, T. Saha and P. Talukdar, *Chem. Commun.*, 2014, **50**, 5510-5513.
- S3 T. Annaka, N. Nakata and A. Ishii, *New J. Chem.*, 2019, **43**, 11643–11652.
- S4 C. Liu, X. Jiao, S. Cai, S. He, L. Zhao and X. Zeng, *Sensors and Actuators B: Chemical*, 2021, **329**, 129213.
- S5 S.-R. Liu and S.-P. Wu, *Org. Lett.*, 2013, **15**, 878–881.
- S6 G. S. Malankar, A. Sakunthala, A. Navalkar, S. K. Maji, S. Raju and S. T. Manjare, *Analytica Chimica Acta*, 2021, **1150**, 338205.
- S7 Z. Qu, J. Ding, M. Zhao and P. Li, *Journal of Photochemistry and Photobiology A:*

- Chemistry*, 2015, **299**, 1–8.
- S8 C. Liu, Y. Shang, T. Zhao, L. Liang, S. He, L. Zhao, X. Zeng and T. Wang, *Sensors and Actuators B: Chemical*, 2021, **348**, 130632.
- S9 S. Han, H. Wang, H. Li, K. Li, J. Wang and X. Song, *Anal. Chem.*, 2023, **95**, 8002–8010.
- S10 S. Zang, X. Kong, J. Cui, S. Su, W. Shu, J. Jing and X. Zhang, *J. Mater. Chem. B*, 2020, **8**, 2660–2665.
- S11 Y. Shen, X. Zhang, C. Zhang and Y. Tang, *Spectrochimica Acta Part A: Molecular and Biomolecular Spectroscopy*, 2023, **285**, 121881.
- S12 X.-H. Xu, C. Liu, Y. Mei and Q.-H. Song, *J. Mater. Chem. B*, 2019, **7**, 6861–6867.
- S13 S. He, W.-L. Fang, X.-F. Guo and H. Wang, *Talanta*, 2023, **253**, 124066.
- S14 X. Xie, T. Wu, X. Wang, Y. Li, K. Wang, Z. Zhao, X. Jiao and B. Tang, *Chem. Commun.*, 2018, **54**, 11965–11968.
- S15 S. V. Mulay, M. Choi, Y. J. Jang, Y. Kim, S. Jon and D. G. Churchill, *Chemistry A European J*, 2016, **22**, 9642–9648.
- S16 S. V. Mulay, T. Yudhistira, M. Choi, Y. Kim, J. Kim, Y. J. Jang, S. Jon and D. G. Churchill, *Chemistry An Asian Journal*, 2016, **11**, 3598–3605.
- S17 P. Li, Y. Jia, N. Zhao, Y. Zhang, P. Zhou, Z. Lou, Y. Qiao, P. Zhang, S. Wen and K. Han, *Anal. Chem.*, 2020, **92**, 12987–12995.
- S18 H. Peng, S. Shi, Z. Lu, L. Liu, S. Peng, P. Wei and T. Yi, *Bioconjugate Chem.*, 2022, **33**, 1602–1608.
- S19 Z. Lou, P. Li and K. Han, in *Advanced Protocols in Oxidative Stress III*, ed. D. Armstrong, Springer New York, New York, NY, 2015, vol. 1208, pp. 97–110.

S20 Z. Lou, P. Li, Q. Pan and K. Han, *Chem. Commun.*, 2013, **49**, 2445.

S21 G. Li, D. Zhu, Q. Liu, L. Xue and H. Jiang, *Org. Lett.*, 2013, **15**, 2002–2005.

S22 W. Zhang, W. Liu, P. Li, J. Kang, J. Wang, H. Wang and B. Tang, *Chem. Commun.*, 2015, **51**, 10150–10153.
